# Supplementary material for: Identifying the sources of uncertainty in climate model simulationsof solar radiation modification with the G6sulfur and G6solarGeoengineering Model Intercomparison Project (GeoMIP)simulations
Source: Copernicus journal article supplement (doi:10.5194/acp-2021-133), 2021-03-09
Supplement: Supplementary file 1 [file acp-2021-133-supplement.pdf]

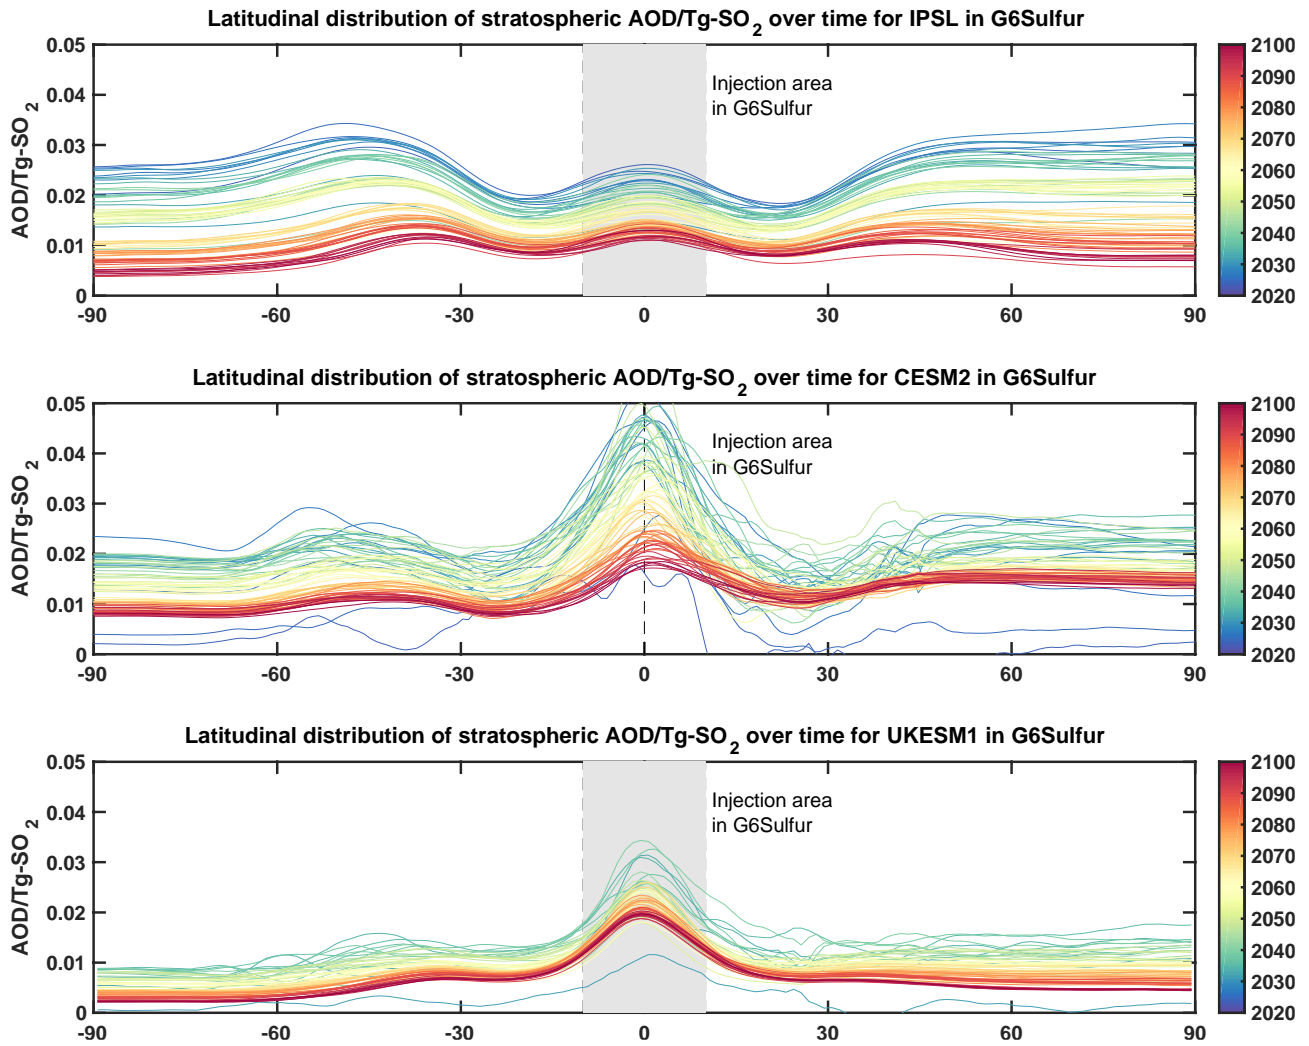

**Fig. S1** Latitudinal distribution of yearly-averaged AOD normalized by amount of SO<sub>2</sub> injected in that year. The color scale indicate the year of analyses.
